# Supplementary material
Source: PubMed Central journal article supplement (PMC2822110)

# Supplementary Figure 1

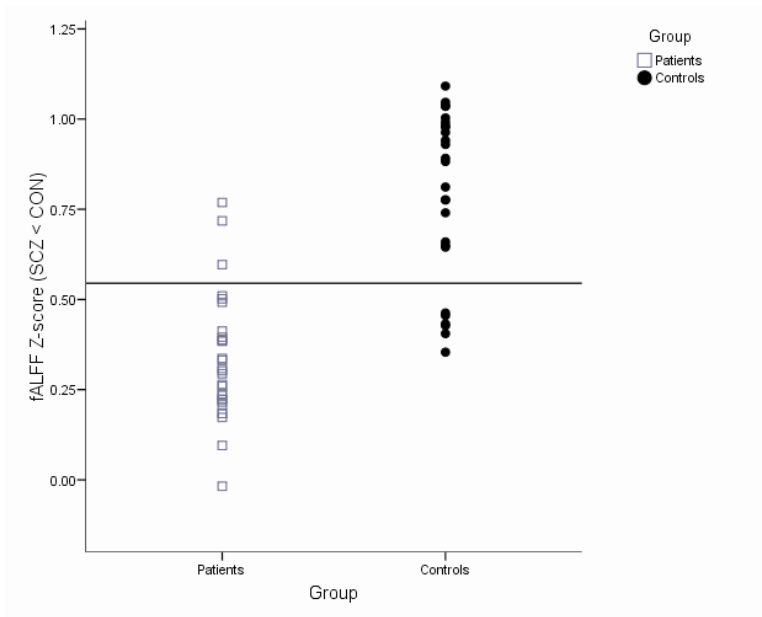

A

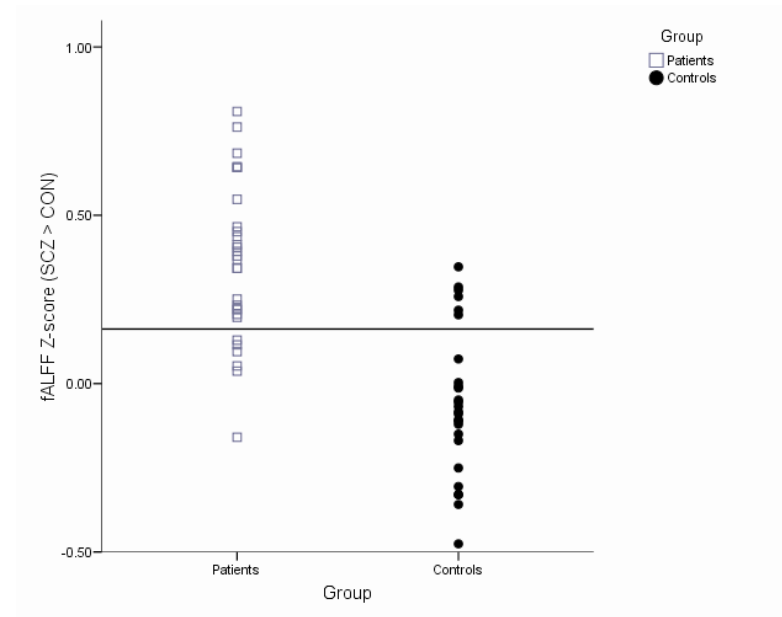

B

## Supplementary Figure 2

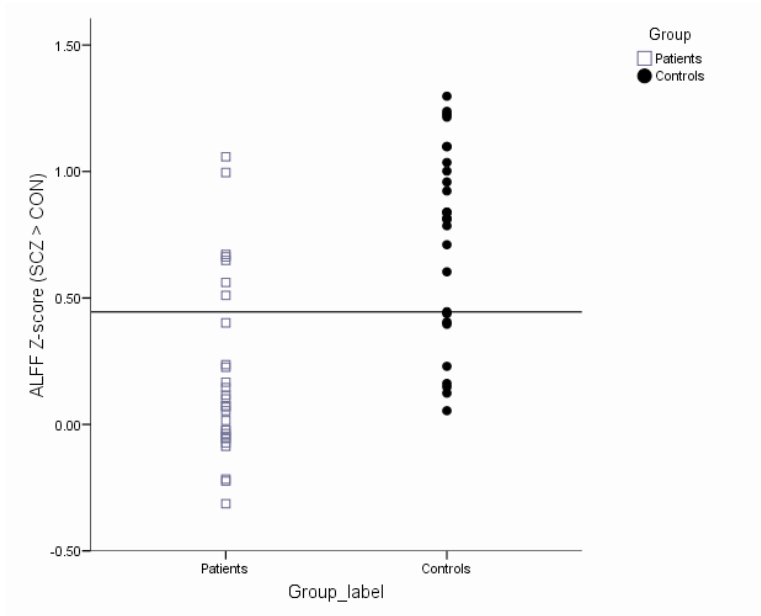

A

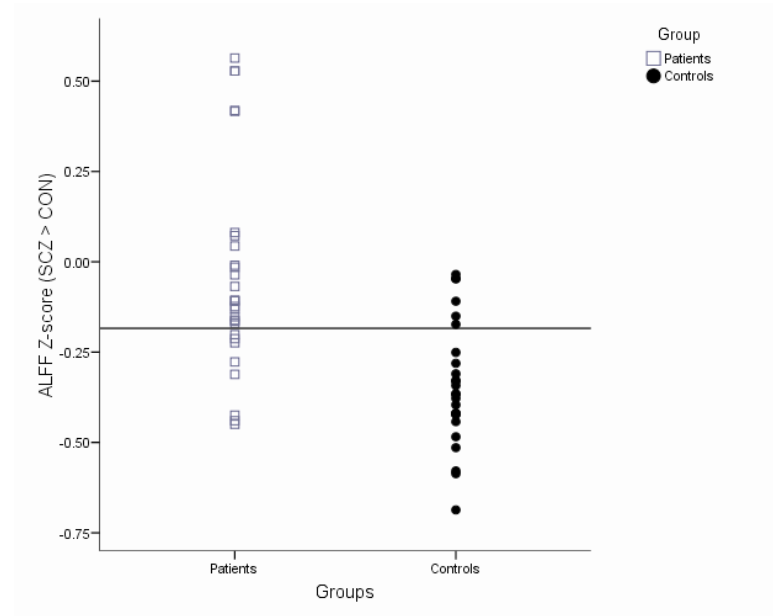

B

Supplement: NIHMS150354-supplement-01.pdf [file NIHMS150354-supplement-01.pdf]
